# Supplementary material for: Mechanisms of interesterified fat digestibility in a muffin matrix using a dynamic gastric model
Source: Royal Society of Chemistry journal article supplement (doi:10.1039/d3fo02963h), 2023-01-01

Suppl. Figure 1. Creamed layer at 84 min gastric digestion: [A] interesterified fat muffin; [B] non-interesterified fat muffin; and [C] RO muffin.

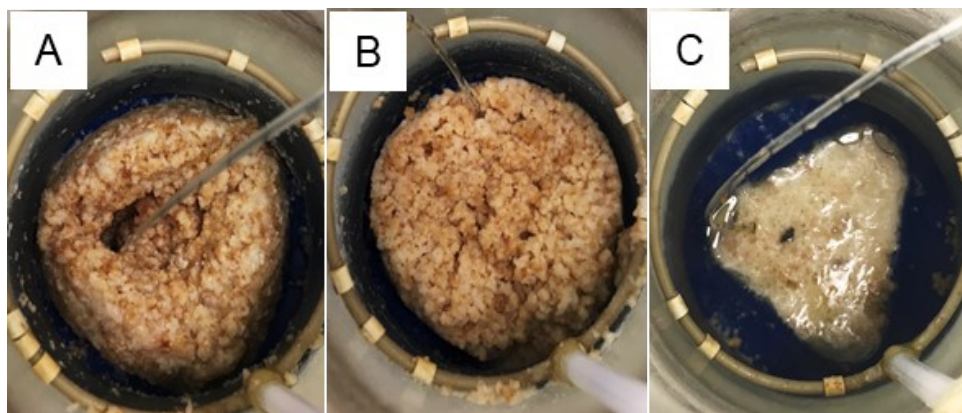

Supplement: d3fo02963h1.pdf [file d3fo02963h1.pdf]
